# Supplementary material for: Transcription Factor MaMsn2 Regulates Conidiation Pattern Shift under the Control of MaH1 through Homeobox Domain in Metarhizium acridum
Source: MDPI journal article supplement (doi:10.3390/jof7100840), 2021-10-07
Supplement: s1 [file s1]

Table S1. Paired primers used in this paper.

| Primer       | Paired sequences (5'–3')                       | Purpose                                          |
|--------------|------------------------------------------------|--------------------------------------------------|
| Msn2-LF      | gacggccagtgccaagcttCGAGTGAGACAAGCGTGGAG        | <i>MaMsn2</i> disruption<br>mutant construction  |
| Msn2-LR      | cggatccctcgagtctagaCATTATGGGAAGATGGATTAGC      |                                                  |
| Msn2-RF      | gctggccgcccattgggatacGTCACCCAGCCCTCCCTCAA      |                                                  |
| Msn2-RR      | atgacatgattacgaattcCCCAAGCATCCTCGGCAAAT        |                                                  |
| CP-Msn2-LF   | gacggccagtgccaagctCGAGTGAGACAAGCGTGGAG         | Complementation<br>for $\Delta MaMsn2$           |
| CP-Msn2-LR   | ccatggcgccgggagcaTTCAAAACGCTTTCGCTTCT          |                                                  |
| CP-Msn2-RF   | cgtggcacgtcgacgatGTCACCCAGCCCTCCCTCAA          |                                                  |
| CP-Msn2-RR   | atgacatgattacgaattCCCAAGCATCCTCGGCAAAT         |                                                  |
| Msn2-ProbeF  | CACCACTCACCATCCTCCAT                           | Probe for Southern<br>blot                       |
| Msn3-ProbeR  | TCCCAAAGTTGCCTCCAC                             |                                                  |
| Msn2pLF      | gacggccagtgccaagctAGGCCAGAGAGTGCCTG            | Knockout for<br><i>MaMsn2</i> <sup>AP3</sup>     |
| Msn2pLR      | cggatccctcgagtctagGAATCTACAACACGATACG          |                                                  |
| Msn2pLF      | gctggccgcccattgggatacGTCACCCAGCCCTCCCTCAA      |                                                  |
| Msn2pLR      | atgacatgattacgaattcCCCAAGCATCCTCGGCAAAT        |                                                  |
| HDF1         | gacggccagtgccaagctCTCATCTCCATCTCTCACC          | Knockout for<br><i>MaH1</i> <sup>AD</sup>        |
| HDR1         | AACAACCTGATTTTGGCTCGTCTTTGTCTTTTCTGGTTCTTC     |                                                  |
| HDF2         | GAAGAACCAGAAAAGACAAAGACGAGCCAAAATCAAGTTG<br>TT |                                                  |
| HDR2         | cggatccctcgagtctagTCACGTAGGATGCGCAAC           |                                                  |
| HDRF         | gctggccgcccattgggatTTCGTTCACAGTCTAGTGG         |                                                  |
| HDRR         | atgacatgattacgaattCACAAGTATGAACCAAGTCC         |                                                  |
| Msn2-oesur-F | tacacacacgcaaatctagaATGGACTCAAACACGATGCC       | Overexpressing<br><i>MaMsn2</i> in $\Delta MaH1$ |
| Msn2-oesur-R | ctcaccatactagtctcgagTTCAAAACGCTTTCGCTTCTTC     |                                                  |
| qF-MedA      | GTCTTGTCAGCCAATGTCGG                           | RT-qPCR for<br>detection                         |
| qR-MedA      | CCAATAGTTGCGGAGCGTCTA                          |                                                  |

|           |                          |                              |
|-----------|--------------------------|------------------------------|
| qF-StuA   | CCAGGTAATCCAGGCGTAGG     | conidiation-related<br>genes |
| qR-StuA   | TGAGAAGCAGAAGCACCATACA   |                              |
| qF-Sho1   | TCGGTGTGTAGTGGTGGTC      |                              |
| qR-Sho1   | GGTGTTGAAGAAGGCGTTGAG    |                              |
| qF-Som1   | AAGGACGGAAAGAGTGGCAA     |                              |
| qR-Som1   | TGAGTGTGAGCGACATATTGGT   |                              |
| qF-abaA   | AAGAAGAGCAGGAGTCATTCAAGT |                              |
| qR-abaA   | GAGCATCGTAGGCAACATCATC   |                              |
| qF-MaH1   | TTGGCGACTTCACAGAGGAT     |                              |
| qR-MaH1   | GACACAGGAGCAGACACAGA     |                              |
| qF-MaMsn2 | GGGTCATCCGTTGTTTCCTTG    |                              |
| qR-MaMsn2 | TTATCCGCAGCAGCAGTGTT     |                              |
